# Supplementary material for: An Anthracene-Based Bis-Stilbene Derivative as Luminescent Materials for Organic Light Emitting Diodes
Source: MDPI journal article supplement (doi:10.3390/ma16103685), 2023-05-12
Supplement: s1 [file s1]

# An Anthracene-Based Bis-Stilbene Derivative as Luminescent Materials for Organic Light Emitting Diodes

Hui Wang<sup>1,2,3,4</sup>, Houlin Wu<sup>3</sup>, Guangling Bian<sup>2,3,4,\*</sup> and Ling Song<sup>3,4,\*</sup>

<sup>1</sup> College of Chemistry and Materials Science, Fujian Normal University, Fuzhou 350007, China; wanghui@fjirsm.ac.cn

<sup>2</sup> Fujian Science & Technology Innovation Laboratory for Optoelectronic Information of China, Fuzhou 350108, China

<sup>3</sup> The Key Laboratory of Coal to Ethylene Glycol and Its Related Technology, Fujian Institute of Research on the Structure of Matter, Chinese Academy of Sciences, Fuzhou 350002, China; wuhoulin@fjirsm.ac.cn

<sup>4</sup> Fujian College, University of Chinese Academy of Sciences, Fuzhou 350002, China

\* Correspondence: glb@fjirsm.ac.cn (G.B.); songling@fjirsm.ac.cn (L.S.)

**Figure S1.** The  $^1\text{H}$  NMR spectra of 10-bromoanthracene-9-carbaldehyde

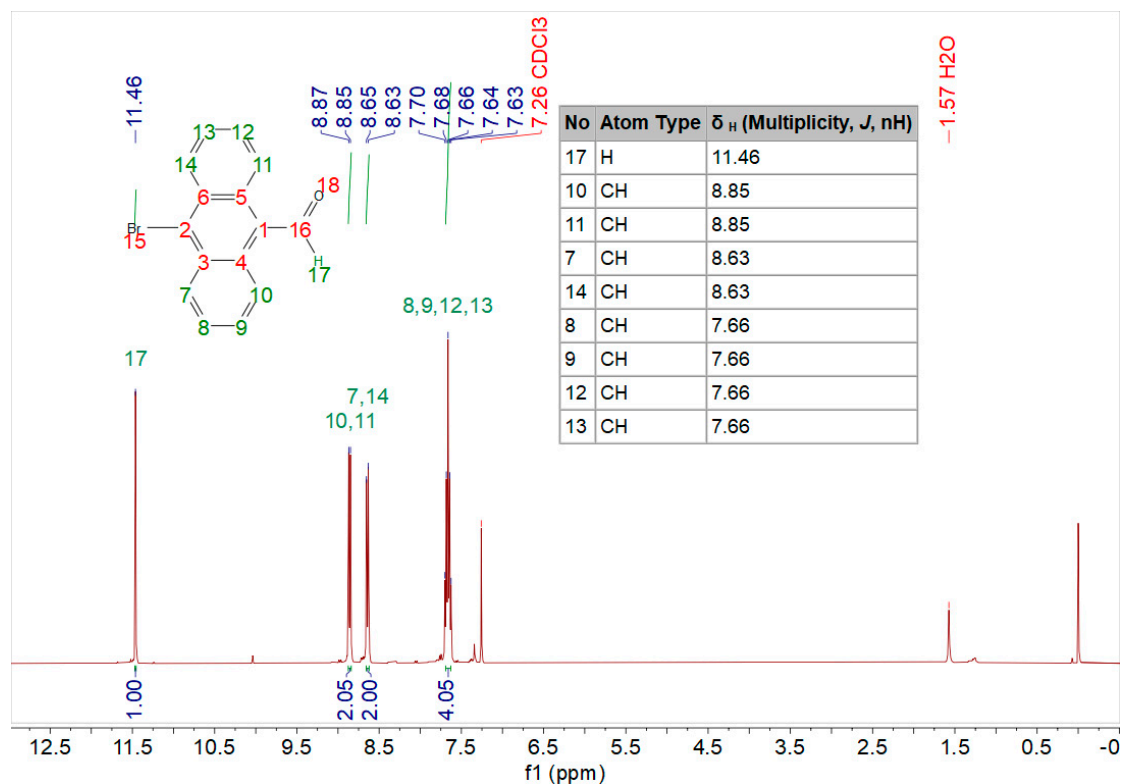

**Figure S2.** The  $^{13}\text{C}$  NMR spectra of 10-bromoanthracene-9-carbaldehyde

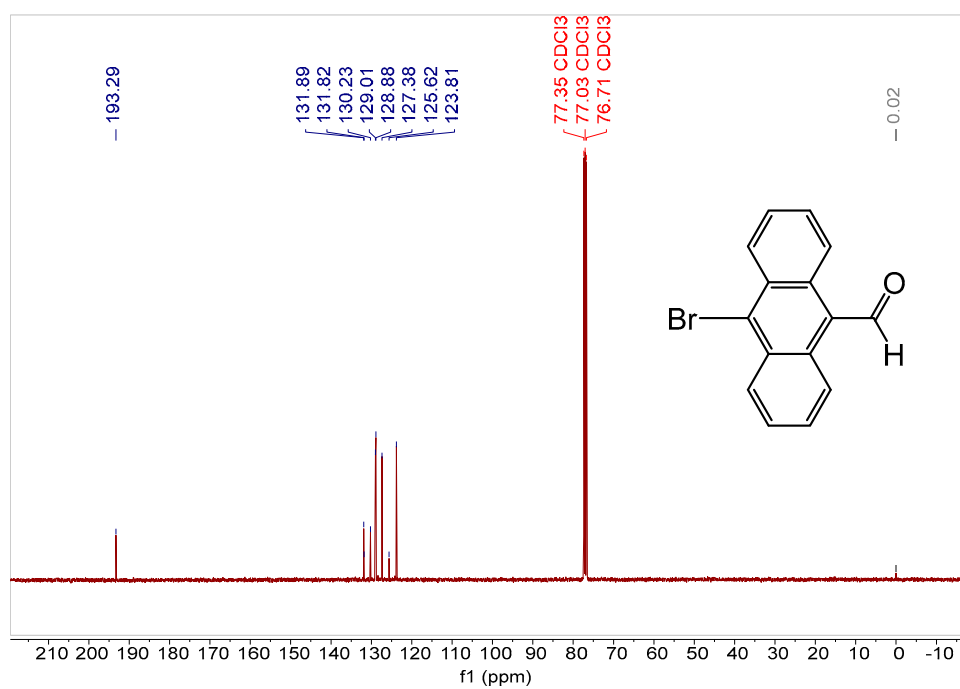

**Figure S3.** The ESI-TOF-MS spectra of 10-bromoanthracene-9-carbaldehyde (Positive Ion Mode)

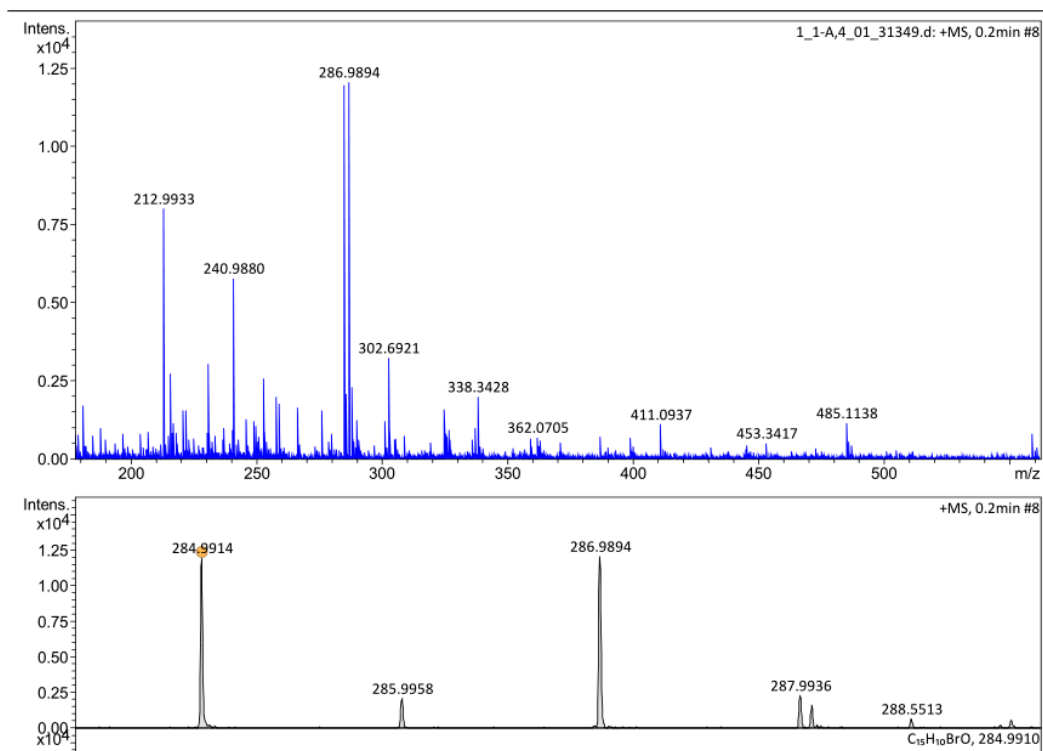

**Figure S4.** The  $^1\text{H}$  NMR spectra of 10-(9H-carbazol-9-yl)anthracene-9-carbaldehyde

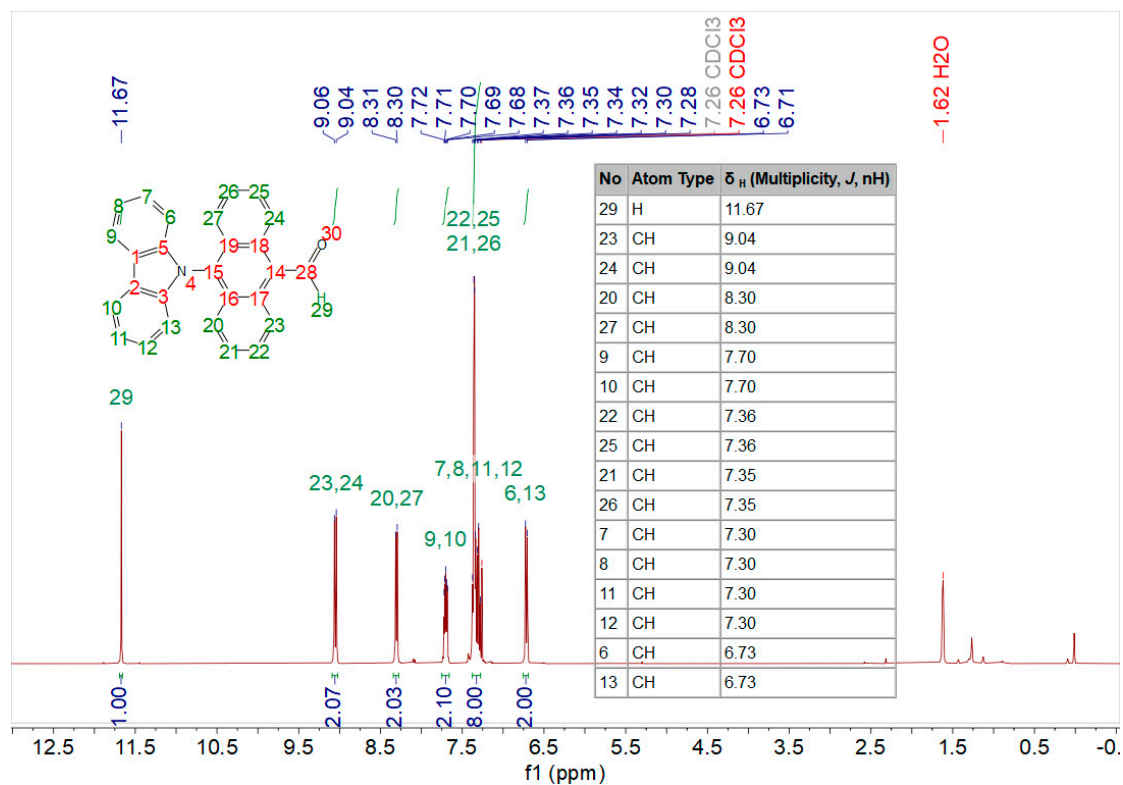

**Figure S5.** The  $^{13}\text{C}$  NMR spectra of 10-(9H-carbazol-9-yl)anthracene-9-carbaldehyde

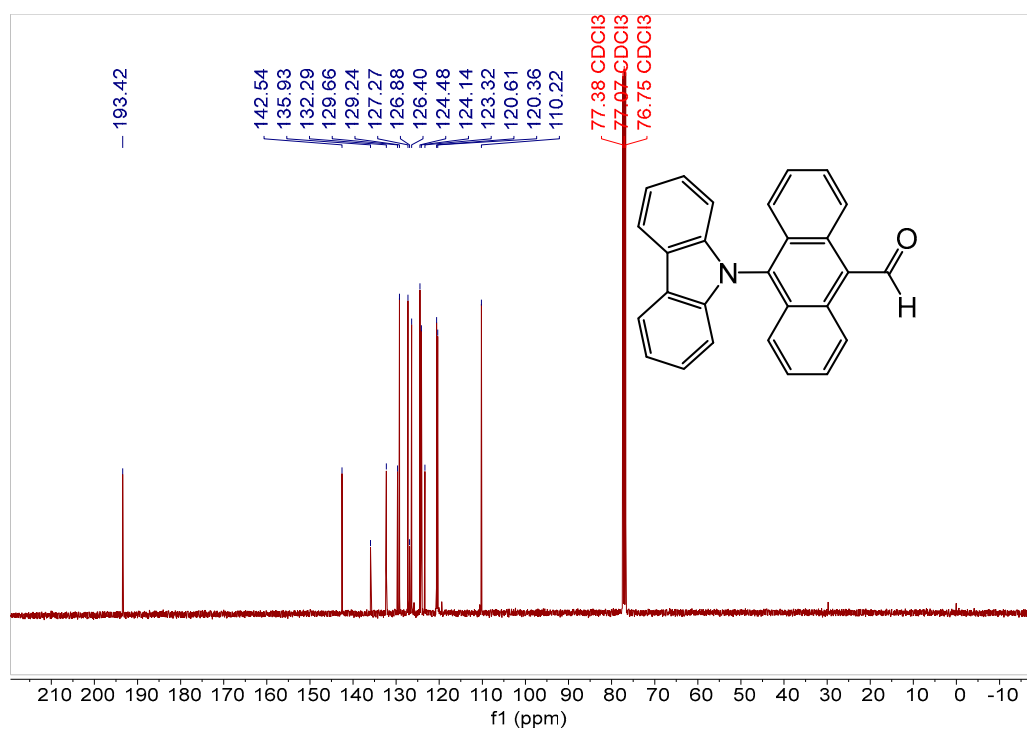

**Figure S6.** The ESI-TOF-MS spectra of 10-(9H-carbazol-9-yl)anthracene-9-carbaldehyde (Positive Ion Mode)

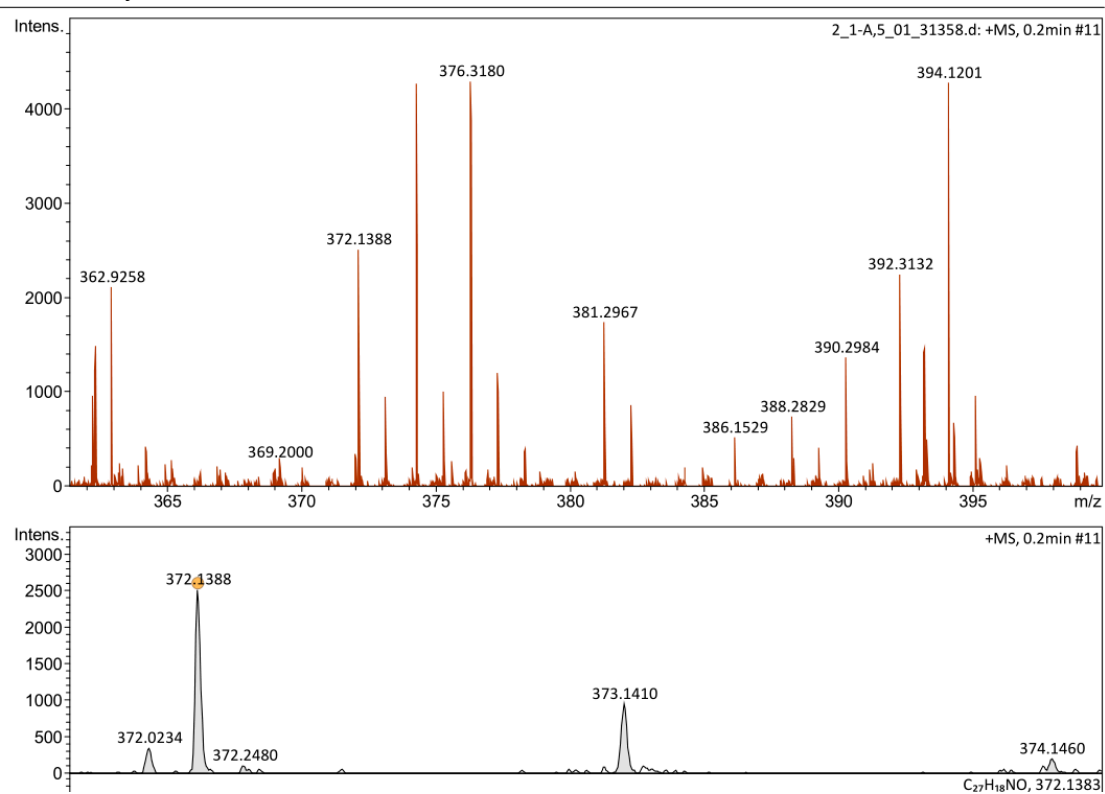

**Figure S7.** The  $^1\text{H}$  NMR spectra of BABCz

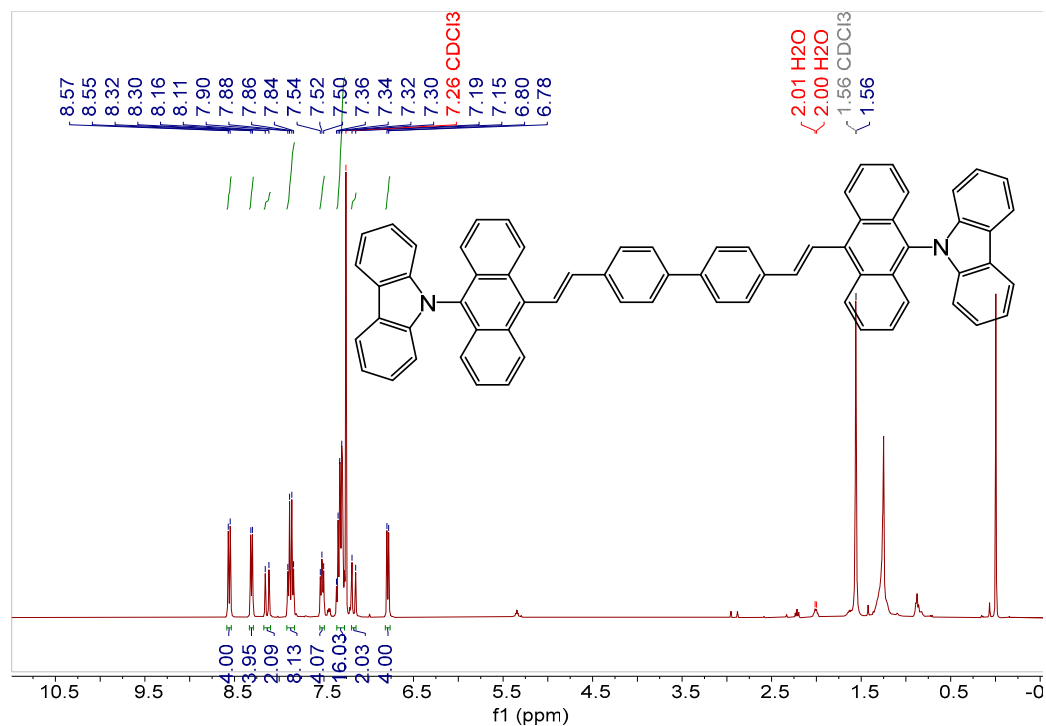

**Figure S8.** The MALDI-TOF-MS spectra of BABCz (Positive Ion Mode)

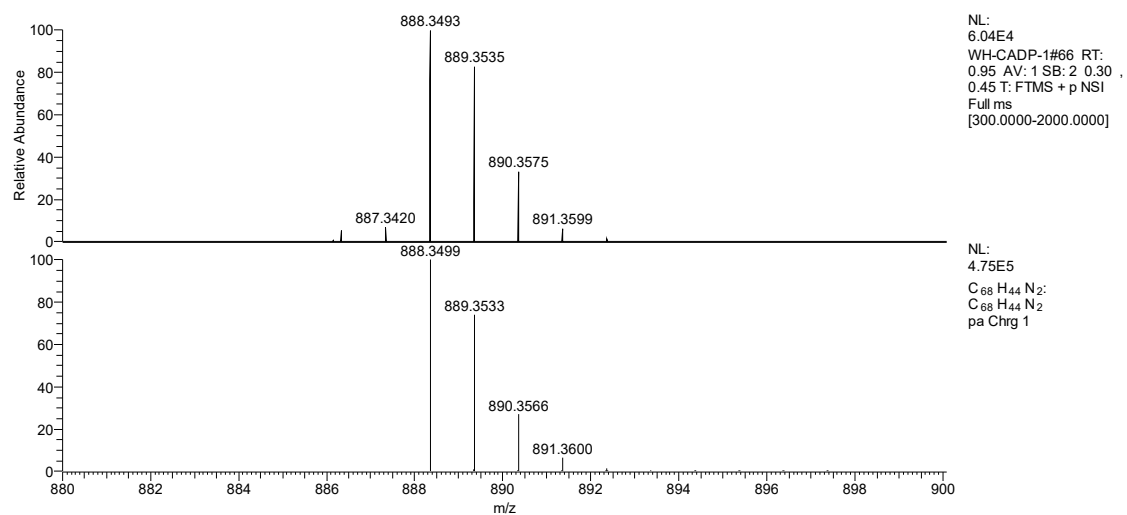

Elemental composition search on mass 888.3493

m/z = 883.3493-893.3493

| m/z      | Theo. Mass | Delta (ppm) | RDB equiv. | Composition                                    |
|----------|------------|-------------|------------|------------------------------------------------|
| 888.3493 | 888.3499   | -0.70       | 48.0       | C <sub>68</sub> H <sub>44</sub> N <sub>2</sub> |
